# Supplementary material for: Estimation of rate coefficients for the reactions of O 3 with unsaturated organic compounds for use in automated mechanism construction
Source: Copernicus journal article supplement (doi:10.5194/acp-20-12921-2020), 2020-11-05
Supplement: Supplementary file 1 [file acp-20-12921-2020-supplement.zip]

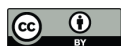

## *Supplement of*

# **Estimation of rate coefficients for the reactions of O<sub>3</sub> with unsaturated organic compounds for use in automated mechanism construction**

**Michael E. Jenkin et al.**

*Correspondence to:* Michael E. Jenkin ([atmos.chem@btinternet.com](mailto:atmos.chem@btinternet.com))

- [acp-20-12921-2020-supplement-title-page.pdf](#)
- [SI\\_1\\_O3\\_alkene\\_preferred data.xls](#)
- [SI\\_2\\_O3\\_unsaturated oxygenate\\_preferred data.xls](#)
- [Supplement\\_example calculations.pdf](#)

The copyright of individual parts of the supplement might differ from the CC BY 4.0 License.
