# Supplementary material for: Estimation of rate coefficients for the reactions of O 3 with unsaturated organic compounds for use in automated mechanism construction
Source: Copernicus journal article supplement (doi:10.5194/acp-20-12921-2020), 2020-11-05
Supplement: Supplementary file 1 [file SI_1_O3_alkene_preferred data.xls]

## Sheet: Notes
Pressure independent rate coefficients for O3 + alkenes
Rate coefficients in the form: k = A.exp(-E/RT) (i)
Notes on data table columns
Systematic name	systematic name of organic compound, usually based on IUPAC nomenclature
Alternative name	alternative/common names for organic compound
Carbon number	the number of carbon atoms in the organic compound
SMILES:	SMILES notation for organic compound				http://www.daylight.com/smiles/index.html
InChI:	InChI notation for organic compound				http://iupac.org/who-we-are/divisions/division-details/inchi/
k(298K):	rate coefficient at 298 K in cm3 molecule-1 s-1
A:	cm3 molecule-1 s-1
E/R:	K
Lower T	Lower bound of valid temperature range (K)
Upper T	Upper bound of valid temperature range (K)
Category:	E = evaluation; P = published; G = grey literature
Source	Source reference
Comment:	Any further information influencing the preferred value
Calculated k(298K):	rate coefficient calculated by SAR at 298 K in cm3 molecule-1 s-1
Parameter optimisation	identifies compounds for which preferred values were used in optimisation of the given parameter
Fig. 2 category	identifies alkene category shown in Fig. 2, and referred to in Sect. 3.5

## Sheet: References
References
Atkinson and Arey (2003)	Atkinson, R. and Arey, J.: Atmospheric degradation of volatile organic compounds, Chem. Rev., 103, 4605-4638, 2003.
Bahta et al. (1984)	Bahta, A., Simonaitis, R., Heicklen, J.: Reactions of ozone with olefins: ethylene, allene, 1,3-butadiene, and trans-1,3-pentadiene, Int. J. Chem. Kinet., 16, 1227-1246, 1984.
Cusick and Atkinson (2005)	Cusick, R. D. and Atkinson, R.: Rate constants for the gas-phase reactions of O3 with a series of cycloalkenes at 296 ± 2 K, Int. J. Chem. Kinet., 37, 183-190, 2005
IUPAC (Date)	Preferred value of the IUPAC Task Group on Atmospheric Chemical Kinetic Data Evaluation, http://iupac.pole-ether.fr/, in March 2019 ("Date" indicates date of evaluation of specific reaction)
Le Person et al. (2008)	Le Person, A., Eyglunent, G., Däele, V., Mellouki, A. and Mub, Y.: The near UV absorption cross-sections and the rate coefficients for the ozonolysis of a series of styrene-like compounds, J. Photochem. Photobiol. A: Chemistry, 195, 54–63, 2008.
Lewin et al. (2001)	Lewin, A. G., Johnson, D., Price, D. W. and Marston, G.: Aspects of the kinetics and mechanism of the gas-phase reactions of ozone with conjugated dienes, Phys. Chem. Chem. Phys., 3, 1253-1261, 2001.
Mason et al. (2009)	Mason, S. A., Arey, J. and Atkinson, R.: Rate constants for the gas-phase reactions of NO3 radicals and O3 with C6-C14 1-alkenes and 2-methyl-1-alkenes at 296 ± 2 K, J. Phys. Chem. A, 113, 5649-5656, 2009.
Stewart et al. (2013)	Stewart, D. J., Almabrok, S. H., Lockhart,J. P., Mohamed, O. M., Nutt, D. R., Pfrang, C. and Marston, G.: The kinetics of the gas-phase reactions of selected monoterpenes and cyclo-alkenes with ozone and the NO3 radical, Atmos. Environ., 70, 227-235, 2013.

## Sheet: acyclic monoalkenes
Systematic name	Aternative name	Carbon number	SMILES	InChI	Reagent	k(298K)	A	E/R	Lower T	Upper T	Category	Source	Comment	Calculated k(298K)	Parameter optimisation	Fig. 2 category
ethene	ethylene	2	C=C	1S/C2H4/c1-2/h1-2H2	O3	1.55e-18	6.82e-15	2500	180	360	E	IUPAC (June 2018)		-	-	(not covered by SAR)
acyclic CH2=CHR
propene	propylene	3	C=CC	1S/C3H6/c1-3-2/h3H,1H2,2H3	O3	1.05e-17	5.77e-15	1880	230	370	E	IUPAC (July 2018)		1e-17	kA1O3 (Table 1)	acyclic monoalkene
but-1-ene		4	C=CCC	1S/C4H8/c1-3-4-2/h3H,1,4H2,2H3	O3	1e-17	3.55e-15	1750	220	370	E	IUPAC (July 2018)		1e-17	kA1O3 (Table 1)	acyclic monoalkene
pent-1-ene		5	C=CCCC	1S/C5H10/c1-3-5-4-2/h3H,1,4-5H2,2H3	O3	1.06e-17	2.13e-15	1580	240	324	E	Atkinson and Arey (2003)		1e-17	kA1O3 (Table 1)	acyclic monoalkene
hex-1-ene		6	C=CCCCC	1S/C6H12/c1-3-5-6-4-2/h3H,1,4-6H2,2H3	O3	9.23982e-18	1.33e-15	1480	240	324	E	Mason et al. (2009)/Atkinson and Arey (2003)		1e-17	kA1O3 (Table 1)	acyclic monoalkene
hept-1-ene		7	C=CCCCCC	1S/C7H14/c1-3-5-7-6-4-2/h3H,1,4-7H2,2H3	O3	1.08771e-17	3.94e-15	1756	278	353	E	Mason et al. (2009)/Atkinson and Arey (2003)		1e-17	kA1O3 (Table 1)	acyclic monoalkene
oct-1-ene		8	C=CCCCCCC	1S/C8H16/c1-3-5-7-8-6-4-2/h3H,1,4-8H2,2H3	O3	1.04455e-17					P	Mason et al. (2009)	Corrected from 296 K using E/R = 1700 K	1e-17	kA1O3 (Table 1)	acyclic monoalkene
dec-1-ene		10	C=CCCCCCCCC	1S/C10H20/c1-3-5-7-9-10-8-6-4-2/h3H,1,4-10H2,2H3	O3	1.149e-17					P	Mason et al. (2009)	Corrected from 296 K using E/R = 1700 K	1e-17	kA1O3 (Table 1)	acyclic monoalkene
3-methyl-but-1-ene		5	C=CC(C)C	1S/C5H10/c1-4-5(2)3/h4-5H,1H2,2-3H3	O3	1.04713e-17					E	Atkinson and Arey (2003)	Corrected from 293 K using E/R = 1700 K	5.4e-18	Fa (alkyl) (Table 2)	acyclic monoalkene
3-methyl-pent-1-ene		6	C=CC(C)CC	1S/C6H12/c1-4-6(3)5-2/h4,6H,1,5H2,2-3H3	O3	4.82765e-18					E	Atkinson and Arey (2003)	Corrected from 286 K using E/R = 1700 K	5.4e-18	Fa (alkyl) (Table 2)	acyclic monoalkene
4-methyl-pent-1-ene		6	C=CCC(C)C	1S/C6H12/c1-4-5-6(2)3/h4,6H,1,5H2,2-3H3	O3	1e-17					E	Atkinson and Arey (2003)		1e-17		acyclic monoalkene
3,3-dimethyl-but-1-ene		6	C=CC(C)(C)C	1S/C6H12/c1-5-6(2,3)4/h5H,1H2,2-4H3	O3	5.05911e-18					E	Atkinson and Arey (2003)	Corrected from 285 K using E/R = 1700 K	2.916e-18	Fa (alkyl) (Table 2)	acyclic monoalkene
acyclic cis-CHR=CHR
cis-but-2-ene		4	C/C=C\C	1S/C4H8/c1-3-4-2/h3-4H,1-2H3/b4-3-	O3	1.3e-16	3.37e-15	970	270	370	E	IUPAC (July 2018)		1.2e-16	kA3O3 (Table 1)	acyclic monoalkene
cis-pent-2-ene		5	C/C=C\CC	1S/C5H10/c1-3-5-4-2/h3,5H,4H2,1-2H3/b5-3-	O3	1.3e-16	3.7e-15	1002	278	353	E	Atkinson and Arey (2003)		1.2e-16	kA3O3 (Table 1)	acyclic monoalkene
cis-hex-2-ene		6	C/C=C\CCC	1S/C6H12/c1-3-5-6-4-2/h3,5H,4,6H2,1-2H3/b5-3-	O3	1.1e-16	3.2e-15	1017	278	353	E	Atkinson and Arey (2003)		1.2e-16	kA3O3 (Table 1)	acyclic monoalkene
cis-hex-3-ene		6	CC/C=C\CC	1S/C6H12/c1-3-5-6-4-2/h5-6H,3-4H2,1-2H3/b6-5-	O3	1.4486e-16					E	Atkinson and Arey (2003)	Corrected from 295 K using E/R = 1000 K	1.2e-16	kA3O3 (Table 1)	acyclic monoalkene
cis-oct-4-ene		8	CCC/C=C\CCC	1S/C8H16/c1-3-5-7-8-6-4-2/h7-8H,3-6H2,1-2H3/b8-7-	O3	9.53042e-17					E	Atkinson and Arey (2003)	Corrected from 293 K using E/R = 1000 K	1.2e-16	kA3O3 (Table 1)	acyclic monoalkene
cis-dec-5-ene		10	CCCC/C=C\CCCC	1S/C10H20/c1-3-5-7-9-10-8-6-4-2/h9-10H,3-8H2,1-2H3/b10-9-	O3	1.16483e-16					E	Atkinson and Arey (2003)	Corrected from 293 K using E/R = 1000 K	1.2e-16	kA3O3 (Table 1)	acyclic monoalkene
acyclic trans-CHR=CHR
trans-but-2-ene		4	C/C=C/C	1S/C4H8/c1-3-4-2/h3-4H,1-2H3/b4-3+	O3	2e-16	7e-15	1060	220	370	E	IUPAC (March 2020)		1.7e-16	kA4O3 (Table 1)	acyclic monoalkene
trans-pent-2-ene		5	C/C=C/CC	1S/C5H10/c1-3-5-4-2/h3,5H,4H2,1-2H3/b5-3+	O3	1.6e-16	7.1e-15	1132	278	353	E	Atkinson and Arey (2003)		1.7e-16	kA4O3 (Table 1)	acyclic monoalkene
trans-hex-2-ene		6	C/C=C/CCC	1S/C6H12/c1-3-5-6-4-2/h3,5H,4,6H2,1-2H3/b5-3+	O3	1.5e-16	7.6e-15	1163	278	353	E	Atkinson and Arey (2003)		1.7e-16	kA4O3 (Table 1)	acyclic monoalkene
trans-hex-3-ene		6	CC/C=C/CC	1S/C6H12/c1-3-5-6-4-2/h5-6H,3-4H2,1-2H3/b6-5+	O3	1.77151e-16					E	Atkinson and Arey (2003)	Corrected from 290 K using E/R = 1100 K	1.7e-16	kA4O3 (Table 1)	acyclic monoalkene
trans-oct-4-ene		8	CCC/C=C/CCC	1S/C8H16/c1-3-5-7-8-6-4-2/h7-8H,3-6H2,1-2H3/b8-7+	O3	1.43935e-16					E	Atkinson and Arey (2003)	Corrected from 290 K using E/R = 1100 K	1.7e-16	kA4O3 (Table 1)	acyclic monoalkene
trans-2,5-dimethyl-hex-3-ene		8	CC(C)/C=C/C(C)C	1S/C8H16/c1-7(2)5-6-8(3)4/h5-8H,1-4H3/b6-5+	O3	4.15285e-17					E	Atkinson and Arey (2003)	Corrected from 291 K using E/R = 1100 K	4.9572e-17	Fa (alkyl) (Table 2)	acyclic monoalkene
trans-2,2-dimethyl-hex-3-ene		8	CC(C)(C)/C=C/CC	1S/C8H16/c1-5-6-7-8(2,3)4/h6-7H,5H2,1-4H3/b7-6+	O3	4.15301e-17					E	Atkinson and Arey (2003)	Corrected from 295 K using E/R = 1100 K	4.9572e-17	Fa (alkyl) (Table 2)	acyclic monoalkene
acyclic CH2=CR2
2-methylpropene		4	C=C(C)C	1S/C4H8/c1-4(2)3/h1H2,2-3H3	O3	1.15e-17	2.92e-15	1650	220	370	E	IUPAC (July 2018)		1.4e-17	kA2O3 (Table 1)	acyclic monoalkene
2-methyl-but-1-ene		5	C=C(C)CC	1S/C5H10/c1-4-5(2)3/h2,4H2,1,3H3	O3	1.4e-17	4.9e-15	1741	278	353	E	Atkinson and Arey (2003)		1.4e-17	kA2O3 (Table 1)	acyclic monoalkene
2-methyl-pent-1-ene		6	C=C(C)CCC	1S/C6H12/c1-4-5-6(2)3/h2,4-5H2,1,3H3	O3	1.3006e-17					P	Mason et al. (2009)	Corrected from 296 K using E/R = 1700 K	1.4e-17	kA2O3 (Table 1)	acyclic monoalkene
2-methyl-hept-1-ene		8	C=C(C)CCCCC	1S/C8H16/c1-4-5-6-7-8(2)3/h2,4-7H2,1,3H3	O3	1.38953e-17					P	Mason et al. (2009)	Corrected from 296 K using E/R = 1700 K	1.4e-17	kA2O3 (Table 1)	acyclic monoalkene
2-methyl-oct-1-ene		9	C=C(C)CCCCCC	1S/C9H18/c1-4-5-6-7-8-9(2)3/h2,4-8H2,1,3H3	O3	1.41733e-17					P	Mason et al. (2009)	Corrected from 296 K using E/R = 1700 K	1.4e-17	kA2O3 (Table 1)	acyclic monoalkene
2-methyl-dec-1-ene		11	C=C(C)CCCCCCCC	1S/C11H22/c1-4-5-6-7-8-9-10-11(2)3/h2,4-10H2,1,3H3	O3	1.52849e-17					P	Mason et al. (2009)	Corrected from 296 K using E/R = 1700 K	1.4e-17	kA2O3 (Table 1)	acyclic monoalkene
2-methyl-undec-1-ene		12	C=C(C)CCCCCCCCC	1S/C12H24/c1-4-5-6-7-8-9-10-11-12(2)3/h2,4-11H2,1,3H3	O3	1.5007e-17					P	Mason et al. (2009)	Corrected from 296 K using E/R = 1700 K	1.4e-17	kA2O3 (Table 1)	acyclic monoalkene
2,3-dimethyl-but-1-ene		6	C=C(C)C(C)C	1S/C6H12/c1-5(2)6(3)4/h6H,1H2,2-4H3	O3	1.29721e-17					E	Atkinson and Arey (2003)	Corrected from 285 K using E/R = 1700 K	7.56e-18	Fa (alkyl) (Table 2)	acyclic monoalkene
2.3.3-trimethyl-but-1-ene		7	C=C(C)C(C)(C)C	1S/C7H14/c1-6(2)7(3,4)5/h1H2,2-5H3	O3	8.37547e-18					E	Atkinson and Arey (2003)	Corrected from 294 K using E/R = 1700 K	4.0824e-18	Fa (alkyl) (Table 2)	acyclic monoalkene
2-ethyl-but-1-ene		5	C=C(CC)CC	1S/C6H12/c1-4-6(3)5-2/h3-5H2,1-2H3	O3	1.3e-17					E	Atkinson and Arey (2003)		1.4e-17	kA2O3 (Table 1)	acyclic monoalkene
3-methyl-2-isopropyl-but-1-ene		8	C=C(C(C)C)C(C)C	1S/C8H16/c1-6(2)8(5)7(3)4/h6-7H,5H2,1-4H3	O3	3.24212e-18					E	Atkinson and Arey (2003)	Corrected from 294 K using E/R = 1700 K	4.0824e-18	Fa (alkyl) (Table 2)	acyclic monoalkene
acyclic CHR=CR2
2-methyl-but-2-ene		5	CC(C)=CC	1S/C5H10/c1-4-5(2)3/h4H,1-3H3	O3	4.03e-16	6.51e-15	829	227	363	E	Atkinson and Arey (2003)		4.7e-16	kA5O3 (Table 1)	acyclic monoalkene
cis-3-methyl-pent-2-ene		6	C/C=C\(C)CC	1S/C6H12/c1-4-6(3)5-2/h4H,5H2,1-3H3/b6-4+	O3	4.5e-16					E	Atkinson and Arey (2003)		4.7e-16	kA5O3 (Table 1)	acyclic monoalkene
trans-3-methyl-pent-2-ene		6	CC=C(C)CC	1S/C6H12/c1-4-6(3)5-2/h4H,5H2,1-3H3	O3	5.5375e-16					E	Atkinson and Arey (2003)	Corrected from 299 K using E/R = 1000 K	4.7e-16	kA5O3 (Table 1)	acyclic monoalkene
2.4.4-trimethyl-pent-2-ene		8	CC(C)=CC(C)(C)C	1S/C8H16/c1-7(2)6-8(3,4)5/h6H,1-5H3	O3	1.41751e-16					E	Atkinson and Arey (2003)	Corrected from 297 K using E/R = 1100 K	1.37052e-16	Fa (alkyl) (Table 2)	acyclic monoalkene
3,4-diethyl-hex-2-ene		10	CC=C(CC)C(CC)CC	1S/C10H20/c1-5-9(6-2)10(7-3)8-4/h5,10H,6-8H2,1-4H3	O3	4.26007e-18					E	Atkinson and Arey (2003)	Corrected from 293 K using E/R = 1100 K	2.538e-16		acyclic monoalkene
acyclic CR2=CR2
2,3-dimethyl-but-2-ene	tetramethylethylene	6	CC(C)=C(C)C	1S/C6H12/c1-5(2)6(3)4/h1-4H3	O3	1.1e-15	3e-15	300	220	370	E	IUPAC (July 2018)		1.1e-15	kA6O3 (Table 1)	acyclic monoalkene
3,4-dimethyl-hex-3-ene (cis- and trans-)		8	CCC(C)=C(C)CC	1S/C8H16/c1-5-7(3)8(4)6-2/h5-6H2,1-4H3	O3	> 3.7E-16					E	Atkinson and Arey (2003)		1.1e-15		-
		number of entries
		43

## Sheet: acyclic dialkenes
Systematic name	Aternative name	Carbon number	SMILES	InChI	Reagent	k(298K)	A	E/R	Lower T	Upper T	Category	Source	Comment	Calculated k(298K)	Parameter optimisation	Fig. 2 category
acyclic dialkenes (isolated)
penta-1,4-diene		5	C=CCC=C	1S/C5H8/c1-3-5-4-2/h3-4H,1-2,5H2	O3	1.45e-17					E	Atkinson and Arey (2003)		2.00437e-17		other (acyclic)
2-methyl-penta-1,4-diene		6	C=C(C)CC=C	1S/C6H10/c1-4-5-6(2)3/h4H,1-2,5H2,3H3	O3	1.3e-17					E	Atkinson and Arey (2003)		2.40307e-17		other (acyclic)
2,5-dimethyl-hexa-1,5-diene		8	C=C(C)CCC(C)=C	1S/C8H14/c1-7(2)5-6-8(3)4/h1,3,5-6H2,2,4H3	O3	1.4e-17					E	Atkinson and Arey (2003)		2.80176e-17		other (acyclic)
acyclic dialkenes (conjugated)
buta-1,3-diene		4	C=CC=C	1S/C4H6/c1-3-4-2/h3-4H,1-2H2	O3	6.3e-18	1.34e-14	2283	231	324	E	Atkinson and Arey (2003)		-	(see Table 4 comments)	(not covered by SAR)
cis-penta-1,3-diene		5	C=C/C=C\C	1S/C5H8/c1-3-5-4-2/h3-5H,1H2,2H3/b5-4-	O3	2.8e-17					P	Lewin et al. (2001)		3.6e-17	kD3O3 (Table 4)	acyclic conjugated diene
trans-penta-1,3-diene		5	C=C/C=C/C	1S/C5H8/c1-3-5-4-2/h3-5H,1H2,2H3/b5-4+	O3	4.3e-17	1.47e-14	1739	240	324	E	Atkinson and Arey (2003), Bahta et al. (1984)		3.6e-17	kD3O3 (Table 4)	acyclic conjugated diene
2-methyl-buta-1,3-diene	isoprene	5	C=C(C)C=C	1S/C5H8/c1-4-5(2)3/h4H,1-2H2,3H3	O3	1.28e-17	1.05e-14	2000	240	360	E	IUPAC (March 2020)		1.3e-17	kD1O3 (Table 4)	acyclic conjugated diene
cis-, trans-hexa-2,4-diene		6	C\C=C/C=C\C	1S/C6H10/c1-3-5-6-4-2/h3-6H,1-2H3	O3	3.1e-16					E	Atkinson and Arey (2003)		3.4e-16	kD7O3 (Table 4)	acyclic conjugated diene
trans-, trans-hexa-2,4-diene		6	C/C=C/C=C/C	1S/C6H10/c1-3-5-6-4-2/h3-6H,1-2H3/b5-3+,6-4+	O3	3.7e-16					E	Atkinson and Arey (2003)		3.4e-16	kD7O3 (Table 4)	acyclic conjugated diene
2-methyl-penta-1,3-diene		6	C=C(C)C=CC	1S/C6H10/c1-4-5-6(2)3/h4-5H,2H2,1,3H3	O3	8e-17					E	Atkinson and Arey (2003)		8e-17	kD4O3 (Table 4)	acyclic conjugated diene
5-methylhexa-1,3-diene (cis- and trans-)		6	C=CC=CC(C)C	1S/C7H12/c1-4-5-6-7(2)3/h4-7H,1H2,2-3H3	O3	2.37e-17					P	Lewin et al. (2001)		2.64545e-17		acyclic conjugated diene
2,3-dimethyl-buta-1,3-diene		6	C=C(C)C(C)=C	1S/C6H10/c1-5(2)6(3)4/h1,3H2,2,4H3	O3	2.6e-17	6.9e-15	1668	240	324	E	Atkinson and Arey (2003)		2.6e-17	kD2O3 (Table 4)	acyclic conjugated diene
2,5-dimethyl-hexa-2,4-diene		8	CC(C)=CC=C(C)C	1S/C8H14/c1-7(2)5-6-8(3)4/h5-6H,1-4H3	O3	3.05e-15					P	Lewin et al. (2001)		3e-15	kD9O3 (Table 4)	acyclic conjugated diene
5,5-dimethylhexa-1,3-diene (cis- and trans-)		8	C=CC=CC(C)(C)C	1S/C8H14/c1-5-6-7-8(2,3)4/h5-7H,1H2,2-4H3	O3	2.52e-17					P	Lewin et al. (2001)		1.944e-17		acyclic conjugated diene
7-methyl-3-methylene-octa-1,6-diene	b-myrcene	10	CC(=CCCC(=C)C=C)C	1S/C10H16/c1-5-10(4)8-6-7-9(2)3/h5,7H,1,4,6,8H2,2-3H3	O3	4.7e-16	2.69e-15	520	290	320	E	IUPAC (August 2018)	Compound also has an isolated double bond	4.82648e-16		other (acyclic)
3,7-dimethyl-octa-1,3,6-triene	b-ocimene (cis- and trans-)	10	C=CC(C)=CCC=C(C)C	1S/C10H16/c1-5-10(4)8-6-7-9(2)3/h5,7-8H,1,6H2,2-4H3	O3	5.1e-16	4.15e-15	625	290	320	E	IUPAC (August 2018)	Compound also has an isolated double bond	5.49648e-16		other (acyclic)
7,11-dimethyl-3-methylene-dodeca-1,6,10-triene	b-farnesene	15	C=CC(CC/C=C(C)/CC/C=C(C)/C)=C	1S/C15H24/c1-6-14(4)10-8-12-15(5)11-7-9-13(2)3/h6,9,12H,1,4,7-8,10-11H2,2-3,5H3/b15-12+	O3	5.6e-16	1.5e-12	2350	290	320	E	IUPAC (August 2018)	Compound also has two isolated double bonds	9.52296e-16		other (acyclic)
acyclic polyalkenes (conjugated)
hexa-1,3-5-triene (cis- and trans-)		6	C=CC=CC=C	1S/C6H8/c1-3-5-6-4-2/h3-6H,1-2H2	O3	2.6e-17					E	Atkinson and Arey (2003)		-	-	(not covered by SAR)
		number of entries
		18

## Sheet: cycloalkenes
Systematic name	Aternative name	Carbon number	SMILES	InChI	Reagent	k(298K)	A	E/R	Lower T	Upper T	Category	Source	Comment	Calculated k(298K)	Parameter optimisation	Fig. 2 category
cyclopentenes
cyclopentene		5	C1=CCCC1	1S/C6H10/c1-6-4-2-3-5-6/h4H,2-3,5H2,1H3	O3	5.7e-16	1.84e-15	350	240	324	E	Atkinson and Arey (2003)		4.69015e-16	Fring (5-member) (Table 3)	monocyclic monoalkene
1-methyl-cyclopentene		6	CC1=CCCC1	1S/C6H10/c1-6-4-2-3-5-6/h4H,2-3,5H2,1H3	O3	8.32e-16					P	Cusick and Atkinson (2005)		1.83163e-15	Fring (5-member) (Table 3)	monocyclic monoalkene
3-methyl-cyclopentene		6	CC1C=CCC1	1S/C6H10/c1-6-4-2-3-5-6/h2,4,6H,3,5H2,1H3	O3	3.34e-16					P	Cusick and Atkinson (2005)		2.53268e-16	Fring (5-member) (Table 3)	monocyclic monoalkene
cyclohexenes
cyclohexene		6	C1=CCCCC1	1S/C6H10/c1-2-4-6-5-3-1/h1-2H,3-6H2	O3	7.9e-17	2.8e-15	1063	240	324	E	Atkinson and Arey (2003)		6.25354e-17	Fring (6-member) (Table 3)	monocyclic monoalkene
1-methyl-cyclohexene		7	CC1=CCCCC1	1S/C7H12/c1-7-5-3-2-4-6-7/h5H,2-4,6H2,1H3	O3	1.46e-16	4.79e-15	1040	240	324	E	Atkinson and Arey (2003)/Cusick et al. (2005)		2.44217e-16	Fring (6-member) (Table 3)	monocyclic monoalkene
3-methyl-cyclohexene		7	CC1C=CCCC1	1S/C7H12/c1-7-5-3-2-4-6-7/h3,5,7H,2,4,6H2,1H3	O3	5.53e-17					P	Cusick and Atkinson (2005)		3.37691e-17	Fring (6-member) (Table 3)	monocyclic monoalkene
4-methyl-cyclohexene		7	CC1CC=CCC1	1S/C7H12/c1-7-5-3-2-4-6-7/h2-3,7H,4-6H2,1H3	O3	7.3e-17	1.78e-15	952			E	Atkinson and Arey (2003)/Cusick et al. (2005)		6.25354e-17	Fring (6-member) (Table 3)	monocyclic monoalkene
1,2-dimethyl-cyclohexene		8	CC1=C(C)CCCC1	1S/C8H14/c1-7-5-3-4-6-8(7)2/h3-6H2,1-2H3	O3	2.07e-16					E	Atkinson and Arey (2003)		5.70053e-16	Fring (6-member) (Table 3)	monocyclic monoalkene
3,7,7-trimethyl-bicyclo[4.1.0]hept-2-ene	2-carene	10	CC2(C1CCC(C)=CC12)C	1S/C10H16/c1-7-4-5-8-9(6-7)10(8,2)3/h6,8-9H,4-5H2,1-3H3	O3	2.4e-16					E	IUPAC (August 2018)		4.88434e-16		other (polycyclic)
3,7,7-trimethyl-bicyclo[4.1.0]hept-3-ene	3-carene	10	CC(C1CC=C(CC12)C)2C	1S/C10H16/c1-7-4-5-8-9(6-7)10(8,2)3/h4,8-9H,5-6H2,1-3H3	O3	4.9e-17					E	IUPAC (August 2018)		4.88434e-16		other (polycyclic)
cycloheptenes
cycloheptene		7	C1=CCCCCC1	1S/C7H12/c1-2-4-6-7-5-3-1/h1-2H,3-7H2	O3	2.43e-16	1.28e-15	494	240	324	E	Atkinson and Arey (2003)		2.40521e-16	Fring (7-member) (Table 3)	monocyclic monoalkene
1-methyl-cycloheptene		8	CC1=CCCCCC1	1S/C8H14/c1-8-6-4-2-3-5-7-8/h6H,2-5,7H2,1H3	O3	9.3e-16					P	Cusick and Atkinson (2005)		9.39296e-16	Fring (7-member) (Table 3)	monocyclic monoalkene
cyclooctenes
cis-cyclooctene		8	C1=CCCCCCC1	1S/C8H14/c1-2-4-6-8-7-5-3-1/h1-2H,3-8H2/b2-1-	O3	3.86e-16	8e-15	217	240	324	E	Atkinson and Arey (2003)/Cusick et al. (2005)		3.36729e-16	Fring (8-member) (Table 3)	monocyclic monoalkene
1-methyl-cyclooctene		9	C/C1=C/CCCCCC1	1S/C9H16/c1-9-7-5-3-2-4-6-8-9/h7H,2-6,8H2,1H3/b9-7-	O3	1.42e-15					P	Cusick and Atkinson (2005)		1.31501e-15	Fring (8-member) (Table 3)	monocyclic monoalkene
3-methyl-cyclooctene		9	CC1\C=C/CCCCC1	1S/C9H16/c1-9-7-5-3-2-4-6-8-9/h5,7,9H,2-4,6,8H2,1H3/b7-5-	O3	1.39e-16					P	Cusick and Atkinson (2005)		1.81834e-16	Fring (8-member) (Table 3)	monocyclic monoalkene
cyclodecenes
cis-cyclodecene		10	C1=CCCCCCCCC1	1S/C10H18/c1-2-4-6-8-10-9-7-5-3-1/h1-2H,3-10H2	O3	2.9e-17	1.09e-15	1081	240	324	E	Atkinson and Arey (2003)		2.88625e-17	Fring (10-member) (Table 3)	monocyclic monoalkene
other cyclo-monoalkenes (with fused cycles)
bicyclo[2.2.1]-hept-2-ene	norbornene	7	C1(C2)C=CC2CC1	1S/C7H10/c1-2-7-4-3-6(1)5-7/h1-2,6-7H,3-5H2	O3	9e-16					P	Stewart et al. (2013)		2.43888e-16		other (polycyclic)
bicyclo[2.2.2]-oct-2-ene		8	C1(CC2)C=CC2CC1	1S/C8H12/c1-2-8-5-3-7(1)4-6-8/h1-2,7-8H,3-6H2	O3	7.1e-17					E	Atkinson and Arey (2003)		3.25184e-17		other (polycyclic)
2,6,6-trimethyl-bicyclo[3.1.1]hept-2-ene	a-pinene	10	CC1(C)C2CC=C(C)C1C2	1S/C10H16/c1-7-4-5-8-6-9(7)10(8,2)3/h4,8-9H,5-6H2,1-3H3	O3	9.6e-17	8.22e-16	640	240	370	E	IUPAC (August 2018)		1.26993e-16		other (polycyclic)
2,6,6,8-tetramethyl-tricyclo[5.3.1.01,5]undec-8-ene	a-cedrene	15	CC2=CCC13C(C)CCC1C(C)(C)C2C3	1S/C15H24/c1-10-7-8-15-9-12(10)14(3,4)13(15)6-5-11(15)2/h7,11-13H,5-6,8-9H2,1-4H3	O3	1.3e-16					P	Richters et al. (2015)		1.17224e-16		other (polycyclic)
8-isopropyl-1,3-dimethyl-tricyclo[4.4.0.02,7]dec-3-ene	a-copaene	15	CC1=CCC2C3C1C(C)2CCC3C(C)C	1S/C15H24/c1-9(2)11-7-8-15(4)12-6-5-10(3)14(15)13(11)12/h5,9,11-14H,6-8H2,1-4H3	O3	1.5e-16					E	IUPAC (August 2018)		3.04783e-17		other (polycyclic)
(1R)-2,2,7,7-tetramethyltricyclo[6.2.1.01.6]undec-5-ene	isolongifolene	15	CC1(CCC=C2C13CCC(C3)C2(C)C)C	1S/C15H24/c1-13(2)8-5-6-12-14(3,4)11-7-9-15(12,13)10-11/h6,11H,5,7-10H2,1-4H3	O3	1e-17					E	IUPAC (August 2018)		3.58917e-17		other (polycyclic)
cyclo compounds with exocyclic monoalkene substituents
methylenecyclohexane		7	C=C1CCCCC1	1S/C7H12/c1-7-5-3-2-4-6-7/h1-6H2	O3	1.1e-17					E	Atkinson and Arey (2003)		1.40088e-17		other (monocyclic)
vinylcyclohexane		8	C=CC1CCCCC1	1S/C8H14/c1-2-8-6-4-3-5-7-8/h2,8H,1,3-7H2	O3	7.5e-18					E	Atkinson and Arey (2003)		1.00218e-17		other (monocyclic)
ethylidene cyclohexane		8	C\C=C1CCCCC/1	1S/C8H14/c1-2-8-6-4-3-5-7-8/h2H,3-7H2,1H3	O3	2.33e-16					P	Stewart et al. (2013)		4.69648e-16		other (monocyclic)
6,6-dimethyl-2-methylene-bicyclo[3.1.1]heptane	b-pinene	10	C=C1C2CC(C(C)2C)CC1	1S/C10H16/c1-7-4-5-8-6-9(7)10(8,2)3/h8-9H,1,4-6H2,2-3H3	O3	1.9e-17	1.39e-15	1280	290	370	E	IUPAC (August 2018)		1.40088e-17		other (polycyclic)
2,2-dimethyl-3-methylene-bicyclo[2.2.1]heptane	camphene	10	C1(=C)C(C)(C)C2CC1CC2	1S/C10H16/c1-7-8-4-5-9(6-8)10(7,2)3/h8-9H,1,4-6H2,2-3H3	O3	5e-19	9e-18	860			E	IUPAC (August 2018)		4.08497e-18		other (polycyclic)
1-isopropyl-4-methylene-bicyclo[3.1.0]hexane	sabinene	10	C=C2C1CC(CC2)1C(C)C	1S/C10H16/c1-7(2)10-5-4-8(3)9(10)6-10/h7,9H,3-6H2,1-2H3	O3	8.3e-17			240	324	E	IUPAC (August 2018)		1.40088e-17		other (polycyclic)
3,3,7-trimethyl-8-methylenetricyclo[5.4.0.02,9]undecane	longifolene	15	C=C2C1(C)CCCC(C)(C)C3C1CCC23	1S/C15H24/c1-10-11-6-7-12-13(11)14(2,3)8-5-9-15(10,12)4/h11-13H,1,5-9H2,2-4H3	O3	< 5E-19					E	IUPAC (August 2018)		7.56476e-18		-
cyclic isolated dienes (endo- or exo-cyclic)
cyclohexa-1,4-diene		6	C1=CCC=CC1	1S/C6H8/c1-2-4-6-5-3-1/h1-2,5-6H,3-4H2	O3	4.6e-17					E	Atkinson and Arey (2003)		1.25071e-16		other (monocyclic)
cycloocta-1,5-diene		8	C1=C/CC/C=C\CC/1	1S/C8H12/c1-2-4-6-8-7-5-3-1/h1-2,7-8H,3-6H2/b2-1-,8-7-	O3	1.52e-16					P	Cusick and Atkinson (2005)		6.73458e-16		other (monocyclic)
4-isopropenyl-1-methyl-cyclohexene	limonene	10	CC1=CCC(CC1)C(C)=C	1S/C10H16/c1-8(2)10-6-4-9(3)5-7-10/h4,10H,1,5-7H2,2-3H3	O3	2.2e-16	2.91e-15	770	290	370	E	IUPAC (August 2018)		2.58226e-16		other (monocyclic)
1-isopropyl-4-methyl-cyclohexa-1,4-diene	g-terpinene	10	CC1=CCC(C(C)C)=CC1	1S/C10H16/c1-8(2)10-6-4-9(3)5-7-10/h4,7-8H,5-6H2,1-3H3	O3	1.6e-16			240	324	E	IUPAC (August 2018)		3.76094e-16		other (monocyclic)
4-isopropylidene-1-methyl-cyclohexene	terpinolene	10	CC(CC1)=CCC1=C(C)C	1S/C10H16/c1-8(2)10-6-4-9(3)5-7-10/h4H,5-7H2,1-3H3	O3	1.6e-15					E	IUPAC (August 2018)		1.34047e-15		other (monocyclic)
4,11,11-trimethyl-8-methylene-bicyclo[7.2.0]undec-4-ene	b-caryophyllene	15	CC1=CCCC(=C)C2CC(C)(C)C2CC1	1S/C15H24/c1-11-6-5-7-12(2)13-10-15(3,4)14(13)9-8-11/h6,13-14H,2,5,7-10H2,1,3-4H3	O3	1.2e-14					E	IUPAC (August 2018)		1.18491e-14	Tentative Fring (9-member) (Sect. 3.2)	other (polycyclic)
3a,4,7,7a-tetrahydro-1H-4,7-methano-indene	dicyclo-pentadiene	10	C13C=CC(C3)C2C1CC=C2	1S/C10H12/c1-2-9-7-4-5-8(6-7)10(9)3-1/h1-2,4-5,7-10H,3,6H2	O3	1.5066e-15					P	Stewart et al. (2013)		3.26998e-15		other (polycyclic)
1-tert-butyl-4-isopropylidene-cyclohexene		13	C\C(C)=C1CCC(C(C)(C)C)=CC/1	1S/C13H22/c1-10(2)11-6-8-12(9-7-11)13(3,4)5/h8H,6-7,9H2,1-5H3	O3	1.2236e-15					P	Stewart et al. (2013)		1.16747e-15		other (monocyclic)
cyclic conjugated dienes (endo- or exo-cyclic)
cyclohexa-1,3-diene		6	C1=CC=CCC1	1S/C6H8/c1-2-4-6-5-3-1/h1-4H,5-6H2	O3	1.2e-15					E	Atkinson and Arey (2003)		1.53e-15	F'ring (6-member) (Table 5)	monocyclic conjugated diene
cyclohepta-1,3-diene		7	C1=CC=CCCC1	1S/C7H10/c1-2-4-6-7-5-3-1/h1-4H,5-7H2	O3	1.5e-16					E	Atkinson and Arey (2003)		1.5e-16	F'ring (7-member) (Table 5)	monocyclic conjugated diene
cycloocta-1,3-diene (cis-,cis-)		8	C1=C/C=C\CCCC/1	1S/C8H12/c1-2-4-6-8-7-5-3-1/h1-4H,5-8H2/b3-1-,4-2-	O3	2e-17					P	Cusick and Atkinson (2005)		2.04e-17	F'ring (8-member) (Table 5)	monocyclic conjugated diene
5-isopropyl-2-methyl-cyclohexa-1,3-diene	a-phellandrene	10	CC(C1C=CC(C)=CC1)C	1S/C10H16/c1-8(2)10-6-4-9(3)5-7-10/h4-6,8,10H,7H2,1-3H3	O3	2.9e-15					E	IUPAC (August 2018)		3.30681e-15	F'ring (6-member) (Table 5)	monocyclic conjugated diene
1-isopropyl-4-methyl-cyclohexa-1,3-diene	a-terpinene	10	CC1=CC=C(C(C)C)CC1	1S/C10H16/c1-8(2)10-6-4-9(3)5-7-10/h4,6,8H,5,7H2,1-3H3	O3	1.9e-14					E	IUPAC (August 2018)		9.92043e-15	F'ring (6-member) (Table 5)	monocyclic conjugated diene
3-isopropyl-6-methylene-cyclohexene	b-phellandrene	10	C=C1CCC(C(C)C)C=C1	1S/C10H16/c1-8(2)10-6-4-9(3)5-7-10/h4,6,8,10H,3,5,7H2,1-2H3	O3	5.2e-17					E	IUPAC (August 2018)		3.05696e-17		other (monocyclic)
cyclic isolated polyenes (endo- or exo-cyclic)
2,6,6,9-tetramethyl-cycloundeca-1,4,8-triene	a-humulene	15	C/C1=C/CC(C)(C)\C=C/C\C(C)=C/CC1	1S/C15H24/c1-13-7-5-8-14(2)10-12-15(3,4)11-6-9-13/h6-7,10-11H,5,8-9,12H2,1-4H3/b11-6-,13-7-,14-10-	O3	1.2e-14					E	IUPAC (August 2018)		1.16924e-14	Tentative Fring (11-member) (Sect. 3.2)	other (monocyclic)
cyclic conjugated polyenes
cyclohepta-1,3-5-triene		7	C1=CC=CC=CC1	1S/C7H8/c1-2-4-6-7-5-3-1/h1-6H,7H2	O3	5.4e-17					E	Atkinson and Arey (2003)		-	-	(not covered by SAR)
cycloocta-1,3,5,7-tetraene		8	C1=C/C=C\C=C/C=C\1	1S/C8H8/c1-2-4-6-8-7-5-3-1/h1-8H/b2-1-,3-1?,4-2?,5-3-,6-4-,7-5?,8-6?,8-7-	O3	2.6e-18					P	Cusick and Atkinson (2005)		-	-	(not covered by SAR)
aromatic hydrocarbon with alkene substituent
ethenylbenzene	styrene	8	C=CC1=CC=CC=C1	1S/C8H8/c1-2-8-6-4-3-5-7-8/h2-7H,1H2	O3	1.7e-17					E	Atkinson and Arey (2003), Le Person et al. (2008)		-	-	(not covered by SAR)
isopropenylbenzene	a-methylstyrene	9	C=C(C)C1=CC=CC=C1	1S/C9H10/c1-8(2)9-6-4-3-5-7-9/h3-7H,1H2,2H3	O3	1.8e-17					P	Le Person et al. (2008)		-	-	(not covered by SAR)
1-methyl-2-ethenyl-benzene	2-methylstyrene	9	C=CC1=CC=CC=C1C	1S/C9H10/c1-3-9-7-5-4-6-8(9)2/h3-7H,1H2,2H3	O3	3.1e-17					P	Le Person et al. (2008)		-	-	(not covered by SAR)
indene		9	C12=C(CC=C2)C=CC=C1	1S/C9H8/c1-2-5-9-7-3-6-8(9)4-1/h1-6H,7H2	O3	1.7e-16					E	Atkinson and Arey (2003), Le Person et al. (2008)		-	-	(not covered by SAR)
		number of entries
		50
