# Supplementary material for: Estimation of rate coefficients for the reactions of O 3 with unsaturated organic compounds for use in automated mechanism construction
Source: Copernicus journal article supplement (doi:10.5194/acp-20-12921-2020), 2020-11-05
Supplement: Supplementary file 2 [file acp-20-12921-2020-supplement.zip]

Archive with 4 entries (4 files):
- acp-20-12921-2020-supplement-title-page.pdf
- SI_1_O3_alkene_preferred data.xls
- Supplement_example calculations.pdf
- SI_2_O3_unsaturated oxygenate_preferred data.xls
