# Supplementary material for: Estimation of rate coefficients for the reactions of O 3 with unsaturated organic compounds for use in automated mechanism construction
Source: Copernicus journal article supplement (doi:10.5194/acp-20-12921-2020), 2020-11-05
Supplement: Supplementary file 2 [file acp-20-12921-2020-supplement.zip › SI_2_O3_unsaturated oxygenate_preferred data.xls]

## Sheet: Notes
Pressure independent rate coefficients for O3 + unsaturated organic oxygenates
Rate coefficients in the form: k = A.exp(-E/RT) (i)
Notes on data table columns
Systematic name	systematic name of organic compound, usually based on IUPAC nomenclature
Alternative name	alternative/common names for organic compound
Carbon number	the number of carbon atoms in the organic compound
SMILES:	SMILES notation for organic compound				http://www.daylight.com/smiles/index.html
InChI:	InChI notation for organic compound				http://iupac.org/who-we-are/divisions/division-details/inchi/
k(298K):	rate coefficient at 298 K in cm3 molecule-1 s-1
A:	cm3 molecule-1 s-1
E/R:	K
Lower T	Lower bound of valid temperature range (K)
Upper T	Upper bound of valid temperature range (K)
Category:	E = evaluation; P = published; G = grey literature
Source	Source reference
Comment:	Any further information influencing the preferred value
Calculated k(298K):	rate coefficient calculated by SAR at 298 K in cm3 molecule-1 s-1
Parameter optimisation	identifies compounds for which preferred values were used in optimisation of the given parameter
Fig. 3 - Fig. 5 category	identifies unsaturated oxygenate category shown in Figs. 3, 4 and 5, and referred to in Sects. 4.1-4.4

## Sheet: References
References
Al Mulla et al. (2010)	Al Mulla, I., Viera, L., Morris, R., Sidebottom, H., Treacy, J. and Mellouki, A.: Kinetics and mechanisms for the reactions of ozone with unsaturated oxygenated compounds. Chem. Phys. Chem., 11, 4069-4078, doi:10.1002/cphc.201000404, 2010.
Atkinson et al. (1994)	Atkinson, R., Arey, J., Aschmann, S. M., Corchnoy, S. B. and Shu, Y.: Rate constants for the gas-phase reactions of cis-3-hexen-1-ol, cis-3-hexenylacetate, trans-2-hexenal, and linalool with OH and NO3 radicals and O3 at 296 ± 2 K, and OH radical formation yields from the O3 reactions", Int. J. Chem. Kinet., 27, 941-955, 1994. https://doi.org/10.1002/kin.550271002
Bernard et al. (2012)	Bernard, F., Daële, V., Mellouki, A. and Sidebottom, H.: Studies of the gas phase reactions of linalool, 6-methyl-5-hepten-2-ol and 3-methyl-1-penten-3-ol with O3 and OH radicals, J. Phys. Chem. A, 116, 6113−6126, 2012.
Calvert et al. (2011)	Calvert, J. G., Mellouki, A., Orlando, J. J., Pilling, M. J. and Wallington, T. J.: The mechanisms of atmospheric oxidation of the oxygenates, Oxford University Press, Oxford. ISBN 978-0-19976707-6, 2011.
Gai et al. (2009)	Gai, Y., Ge, M. and Wang, W.: Rate constants for the gas phase reaction of ozone with -butyl acrylate and ethyl methacrylate, Chem. Phys. Lett., 473, 57-60, 2009.
Gai et al. (2011)	Gai, Y., Ge, M. and Wang, W.: Rate constants for the gas phase reactions of some unsaturated alcohols with Cl Atoms and O3, Atmos. Environ., 45, 53-59, 2011. https://doi.org/10.1016/j.atmosenv.2010.09.047
Gai et al. (2013)	Gai, Y., Wang, W., Ge, M., Kjaergaard, H. G., Jørgensen, S. and Du, L.: Methyl chavicol reactions with ozone, OH and NO3 radicals: rate constants and gas-phase products, Atmos. Environ., 77, 696-702, 2013. https://doi.org/10.1016/j.atmosenv.2013.05.041
Gaona Colmán et al. (2013)	Gaona Colmán, E., Blanco, M. B., Barnes, I. and Teruel, M. A.: Gas phase kinetics for the ozonolysis of n-butyl methacrylate, ethyl crotonate and vinyl propionate under atmospheric conditions, Chem. Phys. Lett., 579, 11–15, 2013.
Gaona Colmán et al. (2015a)	Gaona Colmán, E., Blanco, M. B., Barnes, I. and Teruel, M. A.: Kinetics of the gas-phase reaction between ozone and three unsaturated oxygenated compounds: Ethyl 3,3-dimethyl acrylate, 2-methyl-2-pentenal and 6-methyl-5-hepten-2-one at atmospheric pressure, Atmos. Environ., 109, 272-278, 2015.
Gaona Colmán et al. (2015b)	Gaona Colmán, E., Blanco, M. B., Barnes, I. and Teruel, M. A.: Ozonolysis of a series of C7–C9 unsaturated biogenic aldehydes: reactivity study at atmospheric pressure, RSC Adv., 5, 30500-30506, 2015.
Gibilisco et al. (2015)	Gibilisco, R. G., Bejan, I., Barnes, I., Wiesen, P. and Teruel, M. A.: FTIR gas kinetic study of the reactions of ozone with a series of hexenols at atmospheric pressure and 298K, Chem. Phys. Lett., 618, 114-118, 2015. https://doi.org/10.1016/j.cplett.2014.11.003
Grosjean et al. (1993)	Grosjean, D., Grosjean, E. and Williams, E. J.: Rate constants for the gas-phase reactions of ozone with unsaturated alcohols, esters, and carbonyls, Int. J. Chem. Kinet., 25, 783-794, 1993. https://doi.org/10.1002/kin.550250909
Ham (2013)	Ham, J. E.: Rate constants for the gas-phase reactions of ozone and nitrate radicals with the sesquiterpenes: valencene and farnesol", Int. J. Chem. Kinet., 45, 508-514, 2013. https://doi.org/10.1002/kin.20789
IUPAC (Date)	Preferred value of the IUPAC Task Group on Atmospheric Chemical Kinetic Data Evaluation, http://iupac.pole-ether.fr/, in March 2019 ("Date" indicates date of evaluation of specific reaction)
Kalalian et al. (2020)	Kalalian, C., El Dib, G., Singh, H. J., Rao, P. K., Roth, E. and Chakir, A.: Temperature dependent kinetic study of the gas phase reaction of ozone with 1-penten-3-ol, cis-2-penten-1-ol and trans-3-hexen-1-ol: Experimental and theoretical data, Atmos. Environ., 223, 117306, 2020.
Lee et al. (2014)	Lee, L., Teng, A. P., Wennberg, P. O., Crounse, J. D. Cohen, R. C.: On rates and mechanisms of OH and O3 reactions with isoprene-derived hydroxy nitrates, J. Phys. Chem. A, 118 (9), 1622-1637, 2014.
Li et al. (2018)	Li, W, Chen, Y., Tong, S., Guo, Y., Zhang, Y. and Ge, M.: Kinetic study of the gas-phase reaction of O3 with three unsaturated alcohols, J. Environ. Sci., 71, 292-299, 2018. https://doi.org/10.1016/j.jes.2018.04.009
Lin et al. (2016)	Lin, X, Ma, Q., Yang, C., Tang, X., Zhao, W., Hu, C., Gu, X., Fang, B., Gai, Y. and Zhang, W.: Kinetics and mechanisms of gas phase reactions of hexenols with ozone, RSC Adv., 6, 83573-83580, 2016. https://doi.org/10.1039/C6RA17107A
Liu et al. (1999)	Liu, X., Jeffries, H. and Sexton, K. G.: Atmospheric photochemical degradation of 1,4-unsaturated dicarbonyls, Environ. Sci. Technol., 33, 4212-4220, 1999.
Lv et al. (2018)	Lv, C., Du, L., Tsona, M., Jiang, X. and Wang, W.: Atmospheric chemistry of 2-methoxypropene and 2-ethoxypropene: kinetics and mechanism study of reactions with ozone, Atmosphere, 9, 401, 2018. https://doi.org/10.3390/atmos9100401
McGillen et al. (2011)	McGillen, M. R., Archibald, A. T., Carey, T., Leather, K. E., Shallcross, D. E., Wenger, J. C. and Percival, C. J.: Structure–activity relationship (SAR) for the prediction of gas-phase ozonolysis rate coefficients: an extension towards heteroatomic unsaturated species, Phys. Chem. Chem. Phys., 13, 2842-2849, 2011.
Ren et al. (2019)	Ren, Y., Cai, M., Daële, V. and Mellouki, A.: Rate coefficients for the reactions of OH radical and ozone with a series of unsaturated esters, Atmos. Environ., 200, 243-253, 2019.
Sato et al. (2004)	Sato, K., Klotz, B., Taketsugu, T. and Toshiyuki, T.: Kinetic measurements for the reactions of ozone with crotonaldehyde and its methyl derivatives and calculations of transition-state theory, Phys. Chem. Chem. Phys., 6, 3969-3976, 2004.
Wang et al. (2010)	Wang, K., Ge, M. and Wang, W.: Kinetics of the gas-phase reactions of 5-hexen-2-one with OH and NO3 radicals and O3, Chem. Phys. Lett., 490, 29-33, 2010.
Wang et al. (2015)	Wang, J., Zhou, L., Wang, W. and Ge, M.: Gas-phase reaction of two unsaturated ketones with atomic Cl and O3: kinetics and products, Phys. Chem. Chem. Phys., 17, 12000-12012, 2015.
Wang et al. (2018)	Wang, S., Du, L., Tsona, N. T and Wang, W.: Gas-phase kinetic and mechanism study of the reactions of O3, OH, Cl and NO3 with unsaturated acetates,Environ. Chem., 15, 411-423, 2018.
Xing et al. (2012)	Xing, J, Ono, M., Kuroda, A., Obi, K., Sato, K. and Imamura, T.: Kinetic study of the daytime atmospheric fate of (Z)-3-hexenal, J. Phys. Chem. A, 116, 8523-8529, 2012. https://doi.org/10.1021/jp303202h
Xiong et al. (2016)	Xiong, F., Borca, C. H., Slipchenko, L. V., and Shepson, P. B.: Photochemical degradation of isoprene-derived 4,1-nitrooxy enal, Atmos. Chem. Phys., 16, 5595-5610, 2016. https://doi.org/10.5194/acp-16-5595-2016
Zhong et al. (2014)	Zhong, L., Gao, Y., Chen, X., Yao, W. and Li, S.: Mechanistic and kinetic study on the ozonolysis of 2,4-hexadienedial, Struct. Chem., 25, 1405–1414, 2014.
Zhou et al. (2006)	Zhou, S., Barnes, I., Zhu, T., Bejan, I. and Benter, T.: Kinetic study of the gas-phase reactions of OH and NO3 radicals and O3 with selected vinyl ethers, J. Phys. Chem. A., 110, 7386-7392, 2006.
Zhou et al. (2012)	Zhou, S., Barnes, I., Zhu, T. and Benter, T.: Kinetic study of gas-phase reactions of OH and NO3 radicals and O3 with iso-butyl and tert-butyl vinyl ethers, J. Phys. Chem., 116, 8885-8892, 2012. https://doi.org/10.1021/jp305992a

## Sheet: alcohols
Systematic name	Aternative name	Carbon number	SMILES	InChI	Reagent	k(298K)	A	E/R	Lower T	Upper T	Category	Source	Comment	Calculated k(298K)	Parameter optimisation	Fig. 3- Fig. 5 category
allylic alcohols
prop-2-en-1-ol	allyl alcohol	3	C=CCO	1S/C3H6O/c1-2-3-4/h2,4H,1,3H2	O3	1.6e-17					E	Calvert et al. (2011)		1.4e-17	Fa (-OH) (Table 2)	allylic oxygenates, -OH (Fig. 3)
trans-but-2-en-1-ol	crotyl alcohol	4	C/C=C/CO	1S/C4H8O/c1-2-3-4-5/h2-3,5H,4H2,1H3/b3-2+	O3	2.5e-16					E	Calvert et al. (2011)		2.38e-16	Fa (-OH) (Table 2)	allylic oxygenates, -OH (Fig. 3)
but-3-en-2-ol		4	CC(O)C=C	1S/C4H8O/c1-3-4(2)5/h3-5H,1H2,2H3	O3	1.6e-17					E	Calvert et al. (2011)		1.4e-17	Fa (-OH) (Table 2)	allylic oxygenates, -OH (Fig. 3)
cis-pent-2-en-1-ol		5	CC/C=C\CO	1S/C5H10O/c1-2-3-4-5-6/h3-4,6H,2,5H2,1H3/b4-3-	O3	1.7e-16	3.51e-15	902	273	333	E	Calvert et al. (2011); T-dependence Kalalian et al. (2020)		1.68e-16	Fa (-OH) (Table 2)	allylic oxygenates, -OH (Fig. 3)
pent-1-en-3-ol		5	C=CC(O)CC	1S/C5H10O/c1-3-5(6)4-2/h3,5-6H,1,4H2,2H3	O3	1.8e-17	2.09e-16	730	273	333	E	Calvert et al. (2011); T-dependence Kalalian et al. (2020)		1.4e-17	Fa (-OH) (Table 2)	allylic oxygenates, -OH (Fig. 3)
2-methyl-but-3-en-2-ol	MBO	5	CC(O)(C)C=C	1S/C5H10O/c1-4-5(2,3)6/h4,6H,1H2,2-3H3	O3	1e-17					E	IUPAC (July 2007)		7.56e-18	Fa (-OH) (Table 2)	allylic oxygenates, -OH (Fig. 3)
cis-hex-2-en-1-ol		6	CCC\C=C/CO	1S/C6H12O/c1-2-3-4-5-6-7/h4-5,7H,2-3,6H2,1H3/b5-4-	O3	7.44e-17					P	Gibilisco et al. (2015); Lin et al. (2016)		1.68e-16		allylic oxygenates, -OH (Fig. 3)
trans-hex-2-en-1-ol		6	CCC/C=C/CO	1S/C6H12O/c1-2-3-4-5-6-7/h4-5,7H,2-3,6H2,1H3/b5-4+	O3	6.54e-17					P	Gibilisco et al. (2015); Lin et al. (2016)		2.38e-16		allylic oxygenates, -OH (Fig. 3)
3-methyl-pent-1-en-3-ol		6	C=CC(O)(C)CC	1S/C6H12O/c1-4-6(3,7)5-2/h4,7H,1,5H2,2-3H3	O3	5.2e-18					E	McGillen et al., (2011); Bernard et al. (2012)		7.56e-18	Fa (-OH) (Table 2)	allylic oxygenates, -OH (Fig. 3)
1-octen-3-ol		8	C=CC(O)CCCCC	1S/C8H16O/c1-3-5-6-7-8(9)4-2/h4,8-9H,2-3,5-7H2,1H3	O3	1.91e-17					P	Li et al. (2018)		1.4e-17	Fa (-OH) (Table 2)	allylic oxygenates, -OH (Fig. 3)
1-nonen-3-ol		9	C=CC(O)CCCCCC	1S/C9H18O/c1-3-5-6-7-8-9(10)4-2/h4,9-10H,2-3,5-8H2,1H3	O3	1.89e-17					P	Li et al. (2018)		1.4e-17	Fa (-OH) (Table 2)	allylic oxygenates, -OH (Fig. 3)
2,6-dimethyl-octa-2,6-dien-8-ol	geraniol	10	CC(C)=CCCC(C)=CCO	1S/C10H18O/c1-9(2)5-4-6-10(3)7-8-11/h5,7,11H,4,6,8H2,1-3H3	O3	9.3e-16					E	Calvert et al. (2011)		1.128e-15	Fa (-OH) (Table 2)	allylic oxygenates, -OH (Fig. 3)
3,7-dimethyl-octa-1,6-dien-3-ol	linalool	10	C=CC(O)(C)CCC=C(C)C	1S/C10H18O/c1-5-10(4,11)8-6-7-9(2)3/h5,7,11H,1,6,8H2,2-4H3	O3	4.2e-16					E	Calvert et al. (2011); Bernard et al. (2012)		4.7756e-16	Fa (-OH) (Table 2)	allylic oxygenates, -OH (Fig. 3)
3,7,11-trimethyl-dodeca-2,6,10-trien-1-ol		15	OCC=C(CCC=C(CCC=C(C)C)C)C	1S/C15H26O/c1-13(2)7-5-8-14(3)9-6-10-15(4)11-12-16/h7,9,11,16H,5-6,8,10,12H2,1-4H3	O3	2.1e-15					P	Ham (2013)		1.598e-15	Fa (-OH) (Table 2)	allylic oxygenates, -OH (Fig. 3)
other unsaturated alcohols
but-3-en-1-ol		4	C=CCCO	1S/C4H8O/c1-2-3-4-5/h2,5H,1,3-4H2	O3	4.9e-18					E	Calvert et al. (2011)		1e-17		remote oxygenates, -OH (Fig. 4)
pent-4-en-1-ol		5	C=CCCCO	1S/C5H10O/c1-2-3-4-5-6/h2,6H,1,3-5H2	O3	7.68e-18					P	Gai et al. (2011)		1e-17		remote oxygenates, -OH (Fig. 4)
pent-4-en-2-ol		5	CC(O)CC=C	1S/C5H10O/c1-3-4-5(2)6/h3,5-6H,1,4H2,2H3	O3	4.88e-18					E	Gai et al. (2011)		1e-17		remote oxygenates, -OH (Fig. 4)
2-methyl-but-3-en-1-ol		5	C=CC(C)CO	1S/C5H10O/c1-3-5(2)4-6/h3,5-6H,1,4H2,2H3	O3	3.74e-18					P	Gai et al. (2011)		5.4e-18		remote oxygenates, -OH (Fig. 4)
3-methyl-but-3-en-1-ol		5	C=C(C)CCO	1S/C5H10O/c1-5(2)3-4-6/h6H,1,3-4H2,2H3	O3	6.8e-18					E	Gai et al. (2011)		1.4e-17		remote oxygenates, -OH (Fig. 4)
hex-3-en-1-ol (cis)		6	OCC\C=C/CC	1S/C6H12O/c1-2-3-4-5-6-7/h3-4,7H,2,5-6H2,1H3/b4-3-	O3	7.21e-17					E	Grosjean et al. (1993); Atkinson et al. (1994); Gibilisco et al. (2015); Lin et al. (2016)		1.2e-16		remote oxygenates, -OH (Fig. 4)
trans-hex-3-en-1-ol		6	CC/C=C/CCO	1S/C6H12O/c1-2-3-4-5-6-7/h3-4,7H,2,5-6H2,1H3/b4-3+	O3	6.01e-17	1.84e-15	1020	273	333	E	Gibilisco et al. (2015); Lin et al. (2016); T-dependence Kalalian et al. (2020)		1.7e-16		remote oxygenates, -OH (Fig. 4)
cis-hex-4-en-1-ol		6	C\C=C/CCCO	1S/C6H12O/c1-2-3-4-5-6-7/h2-3,7H,4-6H2,1H3/b3-2-	O3	1.66e-16					P	Lin et al. (2016)		1.2e-16		remote oxygenates, -OH (Fig. 4)
trans-hex-4-en-1-ol		6	C/C=C/CCCO	1S/C6H12O/c1-2-3-4-5-6-7/h2-3,7H,4-6H2,1H3/b3-	O3	1.05e-16					P	Lin et al. (2016)		1.7e-16		remote oxygenates, -OH (Fig. 4)
6-methyl-hept-5-en-2-ol		8	CC(O)CCC=C(C)C	1S/C8H16O/c1-7(2)5-4-6-8(3)9/h5,8-9H,4,6H2,1-3H3	O3	3.8e-16					P	Bernard et al. (2012)		4.7e-16		remote oxygenates, -OH (Fig. 4)
non-1-en-4-ol		9	C=CCC(O)CCCCC	1S/C9H18O/c1-3-5-6-8-9(10)7-4-2/h4,9-10H,2-3,5-8H2,1H3	O3	8.3e-18					P	Li et al. (2018)		1e-17		remote oxygenates, -OH (Fig. 4)
2,6-dimethyl-oct-7-en-2-ol	dihydromyrcenol	10	CC(O)(C)CCCC(C)C=C	1S/C10H20O/c1-5-9(2)7-6-8-10(3,4)11/h5,9,11H,1,6-8H2,2-4H3	O3	< 2E-18					E	Calvert et al. (2011)		5.4e-18
2-(4-methylcyclohex-3-en-1-yl)propan-2-ol	a-terpineol	10	CC(O)(C1CC=C(C)CC1)C	1S/C10H18O/c1-8-4-6-9(7-5-8)10(2,3)11/h4,9,11H,5-7H2,1-3H3	O3	3e-16					E	Calvert et al. (2011)		2.444e-16		remote oxygenates, -OH (Fig. 4)
3,7-dimethyl-oct-6-en-1-ol	citronellol	10	CC(C)=CCCC(C)CCO	1S/C10H20O/c1-9(2)5-4-6-10(3)7-8-11/h5,10-11H,4,6-8H2,1-3H3	O3	2.4e-16					E	Calvert et al. (2011)		4.7e-16		remote oxygenates, -OH (Fig. 4)
		number of entries
		28

## Sheet: aldehydes
Systematic name	Aternative name	Carbon number	SMILES	InChI	Reagent	k(298K)	A	E/R	Lower T	Upper T	Category	Source	Comment	Calculated k(298K)	Parameter optimisation	Fig. 3- Fig. 5 category
vinylic aldehydes
prop-2-enal	acrolein	3	C=CC=O	1S/C3H4O/c1-2-3-4/h2-3H,1H2	O3	2.9e-19					E	Calvert et al. (2011)		-	-	(not covered by SAR)
trans-but-2-enal	crotonaldehyde	4	CC=CC=O	1S/C4H6O/c1-2-3-4-5/h2-4H,1H3	O3	1.4e-18					E	Calvert et al. (2011)		1.4e-18	kVC2O3 (Table 6)	vinyl aldehydes (Fig. 5)
2-methyl-prop-2-enal	methacrolein	4	C=C(C)C=O	1S/C4H6O/c1-4(23-5/h3H,1H2,2H3	O3	1.2e-18	1.4e-15	2100	240	330	E	IUPAC (December 2007)		1.2e-18	kVC1O3 (Table 6)	vinyl aldehydes (Fig. 5)
trans-pent-2-enal		5	CC/C=C/C=O	1S/C5H8O/c1-2-3-4-5-6/h3-5H,2H2,1H3/b4-3+	O3	1.6e-18					P	Sato et al. (2004)		1.666e-18	kVC2O3 (Table 6)	vinyl aldehydes (Fig. 5)
trans-2-methyl-but-2-enal		6	C/C=C(C)/C=O	1S/C5H8O/c1-3-5(2)4-6/h3-4H,1-2H3/b5-3+	O3	5.3e-18					P	Sato et al. (2004)		5.7e-18	kVC4O3 (Table 6)	vinyl aldehydes (Fig. 5)
3-methyl-but-2-enal		5	CC(C)=CC=O	1S/C5H8O/c1-5(2)3-4-6/h3-4H,1-2H3	O3	1.8e-18					P	Sato et al. (2004)		1.8e-18	kVC3O3 (Table 6)	vinyl aldehydes (Fig. 5)
trans-hex-2-enal		6	CCC/C=C/C=O	1S/C6H10O/c1-2-3-4-5-6-7/h4-6H,2-3H2,1H3/b5-4+	O3	2.1e-18					E	Calvert et al. (2011)		1.932e-18	kVC2O3 (Table 6)	vinyl aldehydes (Fig. 5)
2-methyl-pent-2-enal		6	CCC=C(C)C=O	1S/C6H10O/c1-3-4-6(2)5-7/h4-5H,3H2,1-2H3	O3	7.1e-18					P	Gaona Colmán et al. (2015a)		6.783e-18	kVC4O3 (Table 6)	vinyl aldehydes (Fig. 5)
trans-hept-2-enal		7	CCCC/C=C/C=O	1S/C7H12O/c1-2-3-4-5-6-7-8/h5-7H,2-4H2,1H3/b6-5+	O3	2.47e-18					P	Gaona Colmán et al. (2015b)		2.198e-18	kVC2O3 (Table 6)	vinyl aldehydes (Fig. 5)
trans-oct-2-enal		8	CCCCC/C=C/C=O	1S/C8H14O/c1-2-3-4-5-6-7-8-9/h6-8H,2-5H2,1H3/b7-6+	O3	2.37e-18					P	Gaona Colmán et al. (2015b)		2.464e-18	kVC2O3 (Table 6)	vinyl aldehydes (Fig. 5)
trans-non-2-enal		9	CCCCCC/C=C/C=O	1S/C9H16O/c1-2-3-4-5-6-7-8-9-10/h7-9H,2-6H2,1H3/b8-7+	O3	2.05e-18					P	Gaona Colmán et al. (2015b)		2.73e-18	kVC2O3 (Table 6)	vinyl aldehydes (Fig. 5)
other unsaturated aldehydes
cis-hex-3-enal		6	CC\C=C/CC=O	1S/C6H10O/c1-2-3-4-5-6-7/h3-4,6H,2,5H2,1H3/b4-3-	O3	3.5e-17					P	Xing et al. (2012)		3.84e-17	Fa (-C(=O)-) (Table 2)	allylic oxygenates, -C(=O)H (Fig. 3)
4-methylenehex-5-enal		7	C=CC(CCC=O)=C	1S/C7H10O/c1-3-7(2)5-4-6-8/h3,6H,1-2,4-5H2	O3	1.5e-17					E	Calvert et al. (2011)		1.3e-17		remote oxygenates, -C(=O)H (Fig. 4)
3(Z-)4-methylhex-3,5-dienal		7	C=C/C(C)=C\CC=O	1S/C7H10O/c1-3-7(2)5-4-6-8/h3,5-6H,1,4H2,2H3/b7-5-	O3	4.4e-17					E	Calvert et al. (2011)		4.52548e-17	Fa (-C(=O)-) (Table 2)	allylic oxygenates, -C(=O)H (Fig. 3)
3(E-)4-methylhex-3,5-dienal		7	C=C/C(C)=C/CC=O	1S/C7H10O/c1-3-7(2)5-4-6-8/h3,5-6H,1,4H2,2H3/b7-5+	O3	5.7e-17					E	Calvert et al. (2011)		4.52548e-17	Fa (-C(=O)-) (Table 2)	allylic oxygenates, -C(=O)H (Fig. 3)
3,7-dimethyl-oct-6-en-1-al	citronellal	10	CC(C)=CCCC(C)CC=O	1S/C10H18O/c1-9(2)5-4-6-10(3)7-8-11/h5,8,10H,4,6-7H2,1-3H3	O3	3.5e-16					E	Calvert et al. (2011)		4.7e-16		remote oxygenates, -C(=O)H (Fig. 4)
unsaturated dialdehydes/ketoaldehydes
butenedial		4	O=CC=CC=O	1S/C4H4O2/c5-3-1-2-4-6/h1-4H	O3	1.6e-18					P	Liu et al. (1999)		-	-	(not covered by SAR)
4-oxo-pent-2-enal		5	CC(C=CC=O)=O	1S/C5H6O2/c1-5(7)3-2-4-6/h2-4H,1H3/b3-2+	O3	4.8e-18					E	Calvert et al. (2011)		5e-18	kVC9O3 (Table 6)	dienals/ones and cyclic vinyl ketones (Fig. 5)
hexa-2,4-dienedial		6	O=CC=CC=CC=O	1S/C6H6O2/c7-5-3-1-2-4-6-8/h1-6H/b3-1+,4-2+	O3	<1E-17					E	Calvert et al. (2011)	Theoretical study of Zhong et al. (2014) reports k = 1.5E-19	1.36e-19	(see Sect. 4.3)	-
		number of entries
		19

## Sheet: ketones and hydroxyketones
Systematic name	Aternative name	Carbon number	SMILES	InChI	Reagent	k(298K)	A	E/R	Lower T	Upper T	Category	Source	Comment	Calculated k(298K)	Parameter optimisation	Fig. 3- Fig. 5 category
acyclic vinylic ketones
but-3-en-2-one	methyl vinyl ketone	4	O=C(C)C=C	1S/C4H6O/c1-3-4(2)5/h3H,1H2,2H3	O3	5.2e-18	8.5e-16	1520	240	330	E	IUPAC (December 2007)		5.2e-18	kVC5O3 (Table 6)	vinyl ketones (Fig. 5)
pent-1-en-3-one		5	C=CC(CC)=O	1S/C5H8O/c1-3-5(6)4-2/h3H,1,4H2,2H3	O3	6e-18					E	Calvert et al. (2011)		6.188e-18	kVC5O3 (Table 6)	vinyl ketones (Fig. 5)
pent-3-en-2-one		5	CC(C=CC)=O	1S/C5H8O/c1-3-4-5(2)6/h3-4H,1-2H3/b4-3+	O3	3.2e-17					E	Calvert et al. (2011)		3.9e-17	kVC7O3 (Table 6)	vinyl ketones (Fig. 5)
3-methyl-but-3-en-2-one		5	CC(C(C)=C)=O	1S/C5H8O/c1-4(2)5(3)6/h1H2,2-3H3	O3	1.18e-17					P	Wang et al. (2015)		1.2e-17	kVC6O3 (Table 6)	vinyl ketones (Fig. 5)
hex-4-ene-3-one		6	CCC(C=CC)=O	1S/C6H10O/c1-3-5-6(7)4-2/h3,5H,4H2,1-2H3/b5-3+	O3	6.4e-17					E	Calvert et al. (2011)		4.641e-17	kVC7O3 (Table 6)	vinyl ketones (Fig. 5)
3-methyl-pent-3-en-2-one		6	CC(C(C)=CC)=O	1S/C6H10O/c1-4-5(2)6(3)7/h4H,1-3H3	O3	4.07e-17					P	Wang et al. (2015)		3.9e-17	kVC7O3 (Table 6)	vinyl ketones (Fig. 5)
4-methyl-pent-3-en-2-one	mesityl oxide	6	CC(C=C(C)C)=O	1S/C6H10O/c1-5(2)4-6(3)7/h4H,1-3H3	O3	8.3e-18					P	Sato et al. (2004)		8.3e-18	kVC8O3 (Table 6)	vinyl ketones (Fig. 5)
other unsaturated acyclic ketones
hex-5-en-2-one		6	CC(CCC=C)=O	1S/C6H10O/c1-3-4-5-6(2)7/h3H,1,4-5H2,2H3	O3	9.2e-18					P	Wang et al. (2010)		1e-17		remote oxygenates, -C(=O)R (Fig. 4)
6-methyl-hept-5-en-2-one		8	CC(CCC=C(C)C)=O	1S/C8H14O/c1-7(2)5-4-6-8(3)9/h5H,4,6H2,1-3H3	O3	3.9e-16					E	Calvert et al. (2011)		4.7e-16		remote oxygenates, -C(=O)R (Fig. 4)
cyclic ketones
cyclohex-2-en-1-one		6	O=C1C=CCCC1	1S/C6H8O/c7-6-4-2-1-3-5-6/h2,4H,1,3,5H2	O3	1.2e-18					E	Calvert et al. (2011)		1.248e-18	(see Sect. 4.3)	dienals/ones and cyclic vinyl ketones (Fig. 5)
4-methyl-cyclohex-3-en-1-one		7	O=C1CC=C(C)CC1	1S/C7H10O/c1-6-2-4-7(8)5-3-6/h2H,3-5H2,1H3	O3	7.4e-17					E	Calvert et al. (2011)		7.8208e-17	Fa (-C(=O)-) (Table 2)	allylic oxygenates, -C(=O)R (Fig. 3)
4-(2,6,6-trimethyl-cyclohex-1-enyl)-but-3-en-2-one	b-ionone	13	CC(C=CC1=C(C)CCCC(C)1C)=O	1S/C13H20O/c1-10-6-5-9-13(3,4)12(10)8-7-11(2)14/h7-8H,5-6,9H2,1-4H3/b8-7+	O3	2.2e-17					E	Calvert et al. (2011)		1.6848e-17	(see Sect. 4.3)	dienals/ones and cyclic vinyl ketones (Fig. 5)
1-(3,6,8,8-Tetramethyl-2,3,4,7,8,8a-hexahydro-1H-3a,7-methano-azulen-5-yl)-ethanone	acetyl-cedrene	17	CC(C2=C(C)[C]3([H])C(C)(C)[C]1([H])CC[CH](C)[C](C3)1C2)=O	1S/C17H26O/c1-10-6-7-15-16(4,5)14-9-17(10,15)8-13(11(14)2)12(3)18/h10,14-15H,6-9H2,1-5H3	O3	2.2e-18					E	Calvert et al. (2011)		5.4912e-18	(see Sect. 4.3)	dienals/ones and cyclic vinyl ketones (Fig. 5)
diketones
hex-3-ene-2,5-dione (cis)		6	CC(/C=C\C(C)=O)=O	1S/C6H8O2/c1-5(7)3-4-6(2)8/h3-4H,1-2H3/b4-3-	O3	1.8e-18					E	Calvert et al. (2011)		5e-18	kVC9O3 (Table 6)	dienals/ones and cyclic vinyl ketones (Fig. 5)
hex-3-ene-2,5-dione (trans)		6	CC(/C=C/C(C)=O)=O	1S/C6H8O2/c1-5(7)3-4-6(2)8/h3-4H,1-2H3/b4-3+	O3	8.3e-18					E	Calvert et al. (2011)		5e-18	kVC9O3 (Table 6)	dienals/ones and cyclic vinyl ketones (Fig. 5)
		number of entries
		15

## Sheet: ethers
Systematic name	Aternative name	Carbon number	SMILES	InChI	Reagent	k(298K)	A	E/R	Lower T	Upper T	Category	Source	Comment	Calculated k(298K)	Parameter optimisation	Fig. 3- Fig. 5 category
vinylic ethers
ethoxyethene	ethyl vinyl ether	4	C=COCC	1S/C4H8O/c1-3-5-4-2/h3H,1,4H2,2H3	O3	1.9e-16					E	Calvert et al. (2011)		2.023e-16	kVO1O3 (Table 8)	vinyl ethers (Fig. 5)
1,1-dimethoxyethene		4	C=C(OC)OC	1S/C4H8O2/c1-4(5-2)6-3/h1H2,2-3H3	O3	4.8e-16					E	McGillen et al. (2011)		4.8e-16	kVO4O3 (Table 8)	vinyl ethers (Fig. 5)
2-methoxypropene		4	C=C(OC)C	1S/C4H8O/c1-4(2)5-3/h1H2,2-3H3	O3	1.2e-17					P	Lv et al. (2018)		1.3e-17	kVO2O3 (Table 8)	vinyl ethers (Fig. 5)
propoxyethene	n-propyl vinyl ether	5	C=COCCC	1S/C5H10O/c1-3-5-6-4-2/h4H,2-3,5H2,1H3	O3	2.3e-16					E	Calvert et al. (2011), Zhou et al. (2006)		2.346e-16	kVO1O3 (Table 8)	vinyl ethers (Fig. 5)
1-ethoxypropene	ethyl 1-propenyl ether	5	CC=COCC	1S/C5H10O/c1-3-5-6-4-2/h3,5H,4H2,1-2H3/b5-3+	O3	>5E-16					E	Calvert et al. (2011)		4.998e-16	kVO3O3 (Table 8)
2-ethoxypropene		5	C=C(OCC)C	1S/C5H10O/c1-4-6-5(2)3/h2,4H2,1,3H3	O3	1.92e-17					P	Lv et al. (2018)		1.547e-17	kVO2O3 (Table 8)	vinyl ethers (Fig. 5)
butoxyethene	n-butyl vinyl ether	6	C=COCCCC	1S/C6H12O/c1-3-5-6-7-4-2/h4H,2-3,5-6H2,1H3	O3	2.6e-16					E	Zhou et al. (2006)		2.669e-16	kVO1O3 (Table 8)	vinyl ethers (Fig. 5)
2-methylpropoxyethene	i-butyl vinyl ether	6	C=COCC(C)C	1S/C6H12O/c1-4-7-5-6(2)3/h4,6H,1,5H2,2-3H3	O3	2.85e-16					P	Zhou et al. (2012)		2.669e-16	kVO1O3 (Table 8)	vinyl ethers (Fig. 5)
1,1-dimethylethoxyethene		6	C=COC(C)(C)C	1S/C6H12O/c1-5-7-6(2,3)4/h5H,1H2,2-4H3	O3	5.3e-16					P	Zhou et al. (2012)		2.669e-16		vinyl ethers (Fig. 5)
2-vinyloxy-ethanol	ethylene glycol vinyl ether	4	OCCOC=C	1S/C4H8O2/c1-2-6-4-3-5/h2,5H,1,3-4H2	O3	2e-16					E	Calvert et al. (2011)	also containing a remote hydroxy group	2.023e-16		vinyl ethers (Fig. 5)
(2-vinyloxy-ethoxy)-ethene	ethylene glycol divinyl ether	6	C=COCCOC=C	1S/C6H10O2/c1-3-7-5-6-8-4-2/h3-4H,1-2,5-6H2	O3	5.4e-16					E	Al Mulla et al. (2010)		5.338e-16		vinyl ethers (Fig. 5)
[2-(2-vinyloxy-ethoxy)-ethoxy]-ethene	diethylene glycol divinyl ether	8	C=COCCOCCOC=C	1S/C8H14O3/c1-3-9-5-7-11-8-6-10-4-2/h3-4H,1-2,5-8H2	O3	2.7e-16					E	Calvert et al. (2011)		6.63e-16		vinyl ethers (Fig. 5)
4-methoxy-but-3-ene-2-one		5	CC(C=COC)=O	1S/C5H8O2/c1-5(6)3-4-7-2/h3-4H,1-2H3/b4-3+	O3	1.3e-17					E	Calvert et al. (2011)	also containing a ketone group	3.9e-17	(see Sect. 4.4)	-
furans and hydrofurans
2,5-dihydrofuran		4	O1CC=CC1	1S/C4H6O/c1-2-4-5-3-1/h1-2H,3-4H2	O3	1.6e-17					E	Calvert et al. (2011)		-	-	(not covered by SAR)
4,5-dihydro-2-methylfuran		5	CC1=CCCO1	1S/C5H8O/c1-5-3-2-4-6-5/h3H,2,4H2,1H3	O3	3.5e-15					E	Calvert et al. (2011)		-	-	(not covered by SAR)
furan		4	O1C=CC=C1	1S/C4H4O/c1-2-4-5-3-1/h1-4H	O3	2.4e-18					E	Calvert et al. (2011)		-	-	(not covered by SAR)
3-methylfuran		5	CC1=COC=C1	1S/C5H6O/c1-5-2-3-6-4-5/h2-4H,1H3	O3	2e-17					E	Calvert et al. (2011)		-	-	(not covered by SAR)
allylic ethers
3-ethoxypropene		5	C=CCOCC	1S/C5H10O/c1-3-5-6-4-2/h3H,1,4-5H2,2H3	O3	8.8e-18					P	Al Mulla et al. (2010)		6e-18	Fa (-OR) (Table 2)	allylic oxygenates, -OR (Fig. 3)
3,4-epoxy-but-1-ene		4	C=CC1CO1	1S/C4H6O/c1-2-4-3-5-4/h2,4H,1,3H2	O3	1.6e-17					E	Calvert et al. (2011)		6e-18		allylic oxygenates, -OR (Fig. 3)
3-methyl-3,4-epoxy-but-1ene	2-methyl-2-vinyloxirane	5	C=CC1(C)CO1	1S/C5H8O/c1-3-5(2)4-6-5/h3H,1,4H2,2H3	O3	2.63e-18					P	Atkinson et al. (1994)		3.24e-18	Fa (-OR) (Table 2)	allylic oxygenates, -OR (Fig. 3)
5-methyl-5-vinyl tetrahydrofuranol		7	OC1OC(C=C)(C)CC1	1S/C7H12O2/c1-3-7(2)5-4-6(8)9-7/h3,6,8H,1,4-5H2,2H3	O3	3.5e-18					E	Calvert et al. (2011)	also containing a remote hydroxy group	3.24e-18	Fa (-OR) (Table 2)	allylic oxygenates, -OR (Fig. 3)
other ethers
1-prop-2-enyl-4-methoxy-benzene	methyl chavicol	10	COC1=CC=C(CC=C)C=C1	1S/C10H12O/c1-3-4-9-5-7-10(11-2)8-6-9/h3,5-8H,1,4H2,2H3	O3	1.03e-17					P	Gai et al. (2013)		1e-17	(see Sect. 4.2)	remote oxygenates, -OR (Fig. 4)
		number of entries
		22

## Sheet: carboxylic acids
Systematic name	Aternative name	Carbon number	SMILES	InChI	Reagent	k(298K)	A	E/R	Lower T	Upper T	Category	Source	Comment	Calculated k(298K)	Parameter optimisation	Fig. 3- Fig. 5 category
alk-1-enoic acids
propenoic acid	acrylic acid	3	C=CC(O)=O	1S/C3H4O2/c1-2-3(4)5/h2H,1H2,(H,4,5)	O3	7.7e-19					E	Al Mulla et al. (2010)		-	-	(not covered by SAR)
2-methyl-propenoic acid	methacrylic acid	4	CC(C(O)=O)=C	1S/C4H6O2/c1-3(2)4(5)6/h1H2,2H3,(H,5,6)	O3	2.1e-18					E	Al Mulla et al. (2010)		2.3e-18	kVA1O3 (Table 7)	alk-1-enoic acids (Fig. 5)
trans-pent-2-enoic acid		5	CC/C=C/C(O)=O	1S/C5H8O2/c1-2-3-4-5(6)7/h3-4H,2H2,1H3,(H,6,7)/b4-3+	O3	3.1e-18					P	McGillen et al. (2011)		2.737e-18	kVA1O3 (Table 7)	alk-1-enoic acids (Fig. 5)
		number of entries
		3

## Sheet: esters
Systematic name	Aternative name	Carbon number	SMILES	InChI	Reagent	k(298K)	A	E/R	Lower T	Upper T	Category	Source	Comment	Calculated k(298K)	Parameter optimisation	Fig. 3- Fig. 5 category
alkanoic acid alk-1-enyl esters
ethanoic acid ethenyl ester	vinyl acetate	4	CC(OC=C)=O	1S/C4H6O2/c1-3-6-4(2)5/h3H,1H2,2H3	O3	3.2e-18					P	Calvert et al. (2011)		3.2e-18	kVE3O3 (Table 7)	alkanoic acid alk-1-enyl esters (Fig. 5)
ethanoic acid isopropenyl ester	i-propenyl acetate	5	CC(OC(C)=C)=O	1S/C5H8O2/c1-4(2)7-5(3)6/h1H2,2-3H3	O3	5.4e-19					E	Calvert et al. (2011), Wang et al. (2018)		5.4e-19	kVE4O3 (Table 7)	alkanoic acid alk-1-enyl esters (Fig. 5)
ethanoic acid 2-methyl-propenyl ester	2-methylpropenyl acetate	6	CC(OC=C(C)C)=O	1S/C6H10O2/c1-5(2)4-8-6(3)7/h4H,1-3H3	O3	2.76e-18					P	Wang et al. (2018)		3.2e-18	kVE3O3 (Table 7)	alkanoic acid alk-1-enyl esters (Fig. 5)
propanoic acid ethenyl ester	vinyl propionate	5	CCC(OC=C)=O	1S/C5H8O2/c1-3-5(6)7-4-2/h4H,2-3H2,1H3	O3	5.3e-18					P	Gaona Colmán et al. (2013)		3.808e-18	kVE3O3 (Table 7)	alkanoic acid alk-1-enyl esters (Fig. 5)
other alkanoic acid alkenyl esters
ethanoic acid prop-2-enyl ester	allyl acetate	5	CC(OCC=C)=O	1S/C5H8O2/c1-3-4-7-5(2)6/h3H,1,4H2,2H3	O3	2.5e-18					E	Calvert et al. (2011)		2.5e-18	Fa (-OC(=O)-) (Table 2)	allylic oxygenates, -OC(=O)R (Fig. 3)
methanoic acid cis-hex-3-enyl ester	cis-3-hexenyl-formate	7	CC\C=C/CCOC=O	1S/C7H12O2/c1-2-3-4-5-6-9-7-8/h3-4,7H,2,5-6H2,1H3/b4-3-	O3	4.06e-17					P	Zhang et al. (2018)		1.2e-16		remote oxygenates, -OC(=O)R (Fig. 4)
ethanoic acid cis-hex-3-enyl ester	cis-hex-3-enyl acetate	8	CC(OCC/C=C\CC)=O	1S/C8H14O2/c1-3-4-5-6-7-10-8(2)9/h4-5H,3,6-7H2,1-2H3/b5-4-	O3	5.8e-17					E	Calvert et al. (2011); Zhang et al. (2018)		1.2e-16		remote oxygenates, -OC(=O)R (Fig. 4)
propanoic acid cis-hex-3-enyl ester	cis-3-hexenyl-propionate	9	CC\C=C/CCOC(CC)=O	1S/C9H16O2/c1-3-5-6-7-8-11-9(10)4-2/h5-6H,3-4,7-8H2,1-2H3/b6-5-	O3	7.62e-17					P	Zhang et al. (2018)		1.2e-16		remote oxygenates, -OC(=O)R (Fig. 4)
butanoic acid cis-hex-3-enyl ester	cis-3-hexenyl-butyrate	10	CC\C=C/CCOC(CCC)=O	1S/C10H18O2/c1-3-5-6-7-9-12-10(11)8-4-2/h5-6H,3-4,7-9H2,1-2H3/b6-5-	O3	1.234e-16					P	Zhang et al. (2018)		1.2e-16		remote oxygenates, -OC(=O)R (Fig. 4)
alk-1-enoic acid alkyl esters
propenoic acid methyl ester	methyl acrylate	4	C=CC(OC)=O	1S/C4H6O2/c1-3-4(5)6-2/h3H,1H2,2H3	O3	1.1e-18					P	Calvert et al. (2011)		1.5e-18	kVE1O3 (Table 7)	alk-1-enoic acid alkyl esters (Fig. 5)
propenoic acid butyl ester	n-butyl acrylate	7	C=CC(OCCCC)=O	1S/C7H12O2/c1-3-5-6-9-7(8)4-2/h4H,2-3,5-6H2,1H3	O3	2.4e-18					P	Gai et al. (2009)		2.355e-18	kVE1O3 (Table 7)	alk-1-enoic acid alkyl esters (Fig. 5)
2-methylpropenoic acid methyl ester	methyl methacrylate	5	CC(C(OC)=O)=C	1S/C5H8O2/c1-4(2)5(6)7-3/h1H2,2-3H3	O3	6.45e-18					P	Ren et al. (2019)		6.5e-18	kVE2O3 (Table 7)	alk-1-enoic acid alkyl esters (Fig. 5)
2-methylpropenoic acid ethyl ester	ethyl methacrylate	6	CC(C(OCC)=O)=C	1S/C6H10O2/c1-4-8-6(7)5(2)3/h2,4H2,1,3H3	O3	7.7e-18					P	Gai et al. (2009), Ren et al. (2019)		7.735e-18	kVE2O3 (Table 7)	alk-1-enoic acid alkyl esters (Fig. 5)
2-methylpropenoic acid propyl ester	n-propyl methacrylate	7	CC(C(OCCC)=O)=C	1S/C7H12O2/c1-4-5-9-7(8)6(2)3/h2,4-5H2,1,3H3	O3	8.46e-18					P	Ren et al. (2019)		8.97e-18	kVE2O3 (Table 7)	alk-1-enoic acid alkyl esters (Fig. 5)
2-methylpropenoic acid butyl ester	n-butyl methacrylate	8	CC(C(OCCCC)=O)=C	1S/C8H14O2/c1-4-5-6-10-8(9)7(2)3/h2,4-6H2,1,3H3	O3	1e-17					P	Gaona Colmán et al. (2013), Ren et al. (2019)		1.0205e-17	kVE2O3 (Table 7)	alk-1-enoic acid alkyl esters (Fig. 5)
2-methylpropenoic acid i-propyl ester	i-propyl methacrylate	7	CC(C(OC(C)C)=O)=C	1S/C7H12O2/c1-5(2)7(8)9-6(3)4/h6H,1H2,2-4H3	O3	1.12e-17					P	Ren et al. (2019)		8.97e-18	kVE2O3 (Table 7)	alk-1-enoic acid alkyl esters (Fig. 5)
2-methylpropenoic acid i-butyl ester	i-butyl methacrylate	8	CC(C(OCC(C)C)=O)=C	1S/C8H14O2/c1-6(2)5-10-8(9)7(3)4/h6H,3,5H2,1-2,4H3	O3	1.08e-17					P	Ren et al. (2019)		1.0205e-17	kVE2O3 (Table 7)	alk-1-enoic acid alkyl esters (Fig. 5)
but-2-enoic acid ethyl ester	ethyl crotonate	6	CC=CC(OCC)=O	1S/C6H10O2/c1-3-5-6(7)8-4-2/h3,5H,4H2,1-2H3	O3	8e-18					P	Gaona Colmán et al. (2013)		7.735e-18	kVE2O3 (Table 7)	alk-1-enoic acid alkyl esters (Fig. 5)
3-methyl-but-2-enoic acid ethyl ester	ethyl 3,3-dimethyl acrylate	7	O=C(OCC)/C=C(C)/C	1S/C7H12O2/c1-4-9-7(8)5-6(2)3/h5H,4H2,1-3H3	O3	8.2e-18					P	Gaona Colmán et al. (2015a)		7.735e-18	kVE2O3 (Table 7)	alk-1-enoic acid alkyl esters (Fig. 5)
		number of entries
		19

## Sheet: nitrogen-containing
Systematic name	Aternative name	Carbon number	SMILES	InChI	Reagent	k(298K)	A	E/R	Lower T	Upper T	Category	Source	Comment	Calculated k(298K)	Parameter optimisation	Fig. 3- Fig. 5 category
hydroxyalkenyl nitrates
3-methyl-2-nitrooxy-but-3-en-1-ol		5	C=C(C)C(O[N+]([O-])=O)CO	1S/C5H9NO4/c1-4(2)5(3-7)10-6(8)9/h5,7H,1,3H2,2H3	O3	see comment					P	Lee et al. (2014)	Reported to have lower limit between 2.6E-19 and 5.0E-19	6.16e-19		-
2-methyl-4-nitrooxy-but-2-en-1-ol (cis and trans)		5	OCC(C)=CCO[N+]([O-])=O	1S/C5H9NO4/c1-5(4-7)2-3-10-6(8)9/h2,7H,3-4H2,1H3/b5-2+	O3	2.9e-17					P	Lee et al. (2014)		2.8952e-17	Fa (-ONO2) (Table 2)	allylic oxygenates, -ONO2 and -OH (Fig. 3)
oxoalkenyl nitrates
2-methyl-4-nitrooxy-cis-but-2-enal		5	O=C/C(C)=C/CO[N+]([O-])=O	1S/C5H7NO4/c1-5(4-7)2-3-10-6(8)9/h2,4H,3H2,1H3/b5-2+	O3	4.4e-18					P	Xiong et al. (2016)	also containing an aldehyde group	5.7e-18	(see Sect. 4.4)	-
peroxyacyl nitrates
peroxymethacryloyl nitrate	MPAN	4	C=C(C)C(OO[N+]([O-])=O)=O	1S/C4H5NO5/c1-3(2)4(6)9-10-5(7)8/h1H2,2H3	O3	8.2e-18					E	IUPAC (December 2007)		6.5e-18	(see Table 7, comment (a))	-
		number of entries
		4
